# Supplementary material
Source: MDPI journal article supplement (https://www.mdpi.com/2297-8739/8/10/188)
Supplement: s1 [file s1]

## Article

# Plasma Short-Chain Fatty Acids and Their Derivatives in Women with Gestational *Diabetes Mellitus*

Eliška Ivanovová <sup>1</sup>, Barbora Pisklaková <sup>1</sup>, Jaroslava Friedecká <sup>1</sup>, Ondřej Krystyník <sup>2</sup>, David Friedecký <sup>1,\*</sup> and David Karásek <sup>2,\*</sup>

<sup>1</sup> Laboratory for Inherited Metabolic Disorders, Department of Clinical Biochemistry, University Hospital Olomouc and Faculty of Medicine and Dentistry, Palacký University Olomouc, I. P. Pavlova 6, 779 00 Olomouc, Czech Republic; eliska.ivanovova@gmail.com (E.I.); barbora.pisklakova@upol.cz (B.P.); jaroslava.friedecka@gmail.com (J.F.)

<sup>2</sup> 3rd Department of Internal Medicine—Nephrology, Rheumatology and Endocrinology, University Hospital Olomouc and Faculty of Medicine and Dentistry, Palacký University Olomouc, I. P. Pavlova 6, 779 00 Olomouc, Czech Republic; ondrej.krystynik@fnol.cz

\* Correspondence: david.friedecky@upol.cz (D.F.); david.karasek@fnol.cz (D.K.); Tel.: +420-58-844-2619 (D.F.); +420-58-844-3381 (D.K.)

**Citation:** Ivanovová, E.; Pisklaková, B.; Friedecká, J.; Krystyník, O.; Friedecký, D.; Karásek, D. Plasma Short-Chain Fatty Acids and Their Derivatives in Women with Gestational *Diabetes Mellitus*. *Separations* **2021**, *8*, 188. <https://doi.org/10.3390/separations8100188>

Academic Editor: Peter Mikuš

Received: 23 September 2021

Accepted: 8 October 2021

Published: 14 October 2021

**Publisher's Note:** MDPI stays neutral with regard to jurisdictional claims in published maps and institutional affiliations.

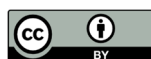

**Copyright:** © 2021 by the authors. Licensee MDPI, Basel, Switzerland. This article is an open access article distributed under the terms and conditions of the Creative Commons Attribution (CC BY) license (<https://creativecommons.org/licenses/by/4.0/>).

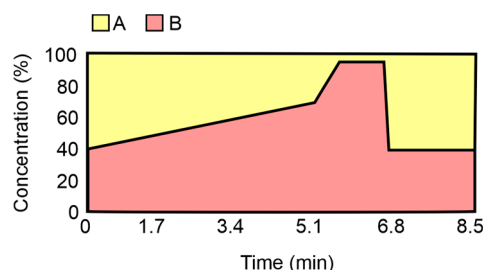

**Figure S1.** Profile of gradient elution of the LC-MS/MS method with mobile phase A nad B (0.5% FA in water and MeOH:IPA at a 9:1 ratio)..

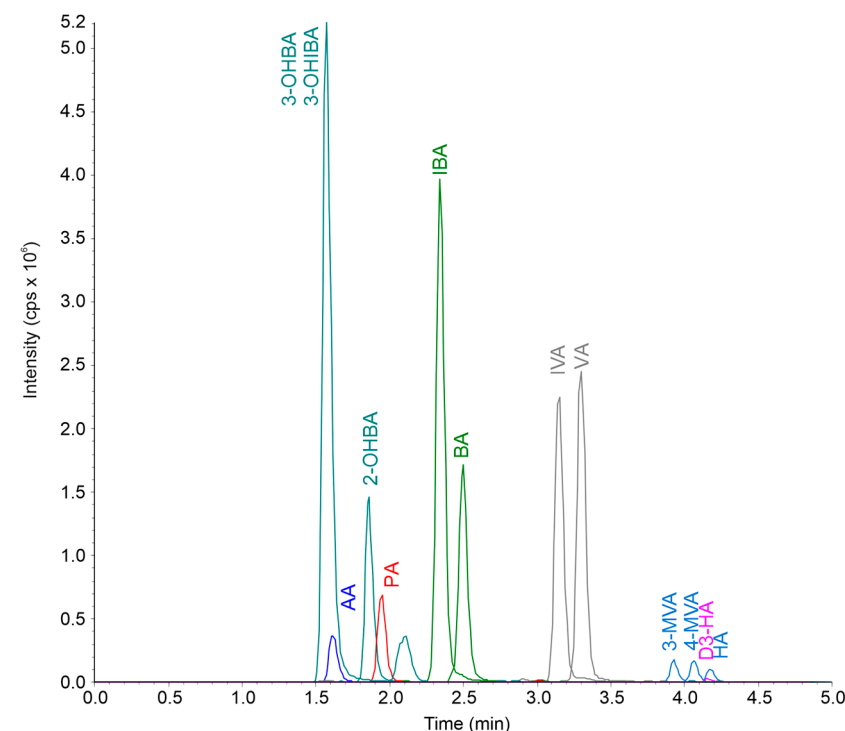

**Figure S2.** LC-MS/MS chromatogram of SCFA, their derivatives and IS in the highest level of CAL1 and CAL2 mixtures.

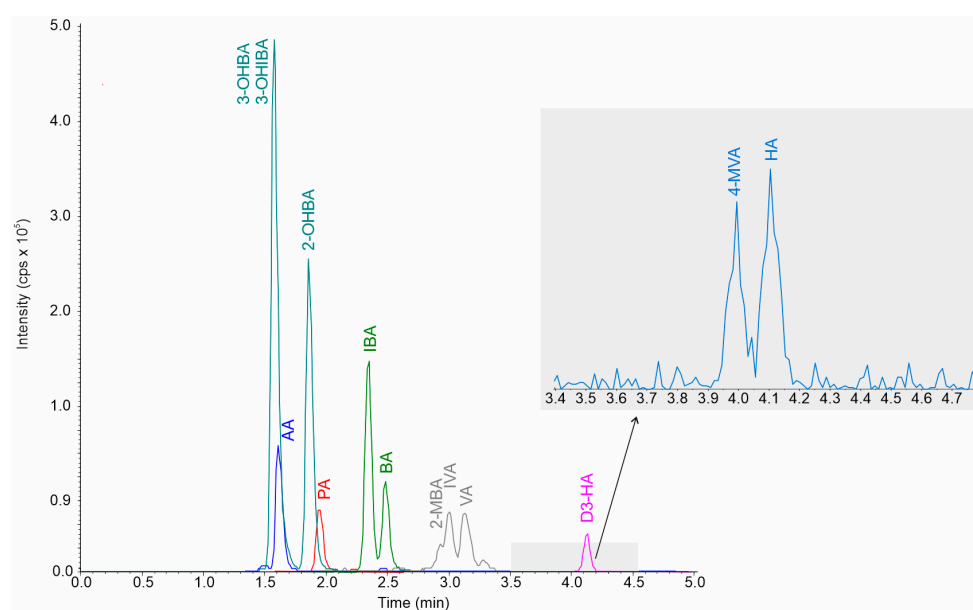

**Figure S3.** LC-MS/MS chromatogram of SCFA, their derivatives and IS in plasma sample of a patient with GDM.

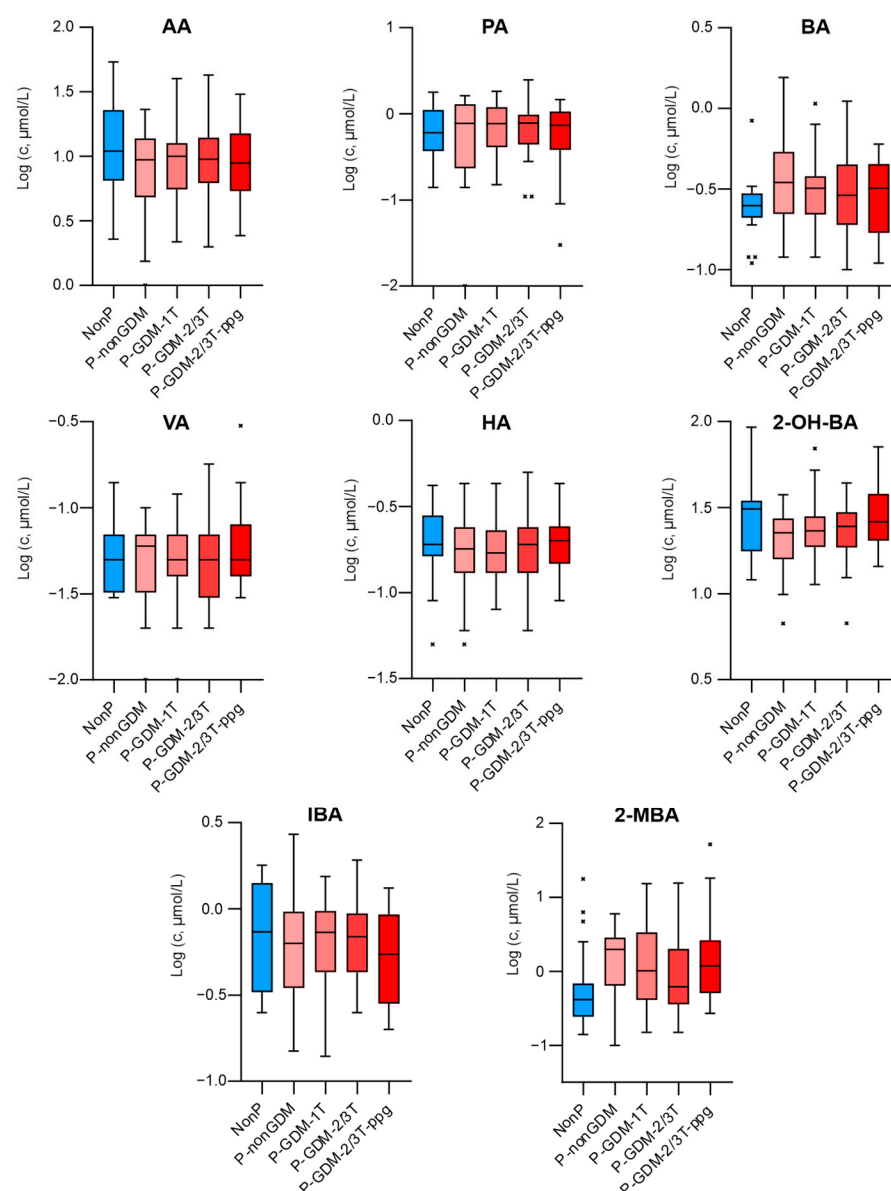

**Figure S4.** Distribution of SCFA and their derivatives without statistical significance for all groups of non-pregnant (blue) and pregnant (red) women. Asterisks represent the outliers.

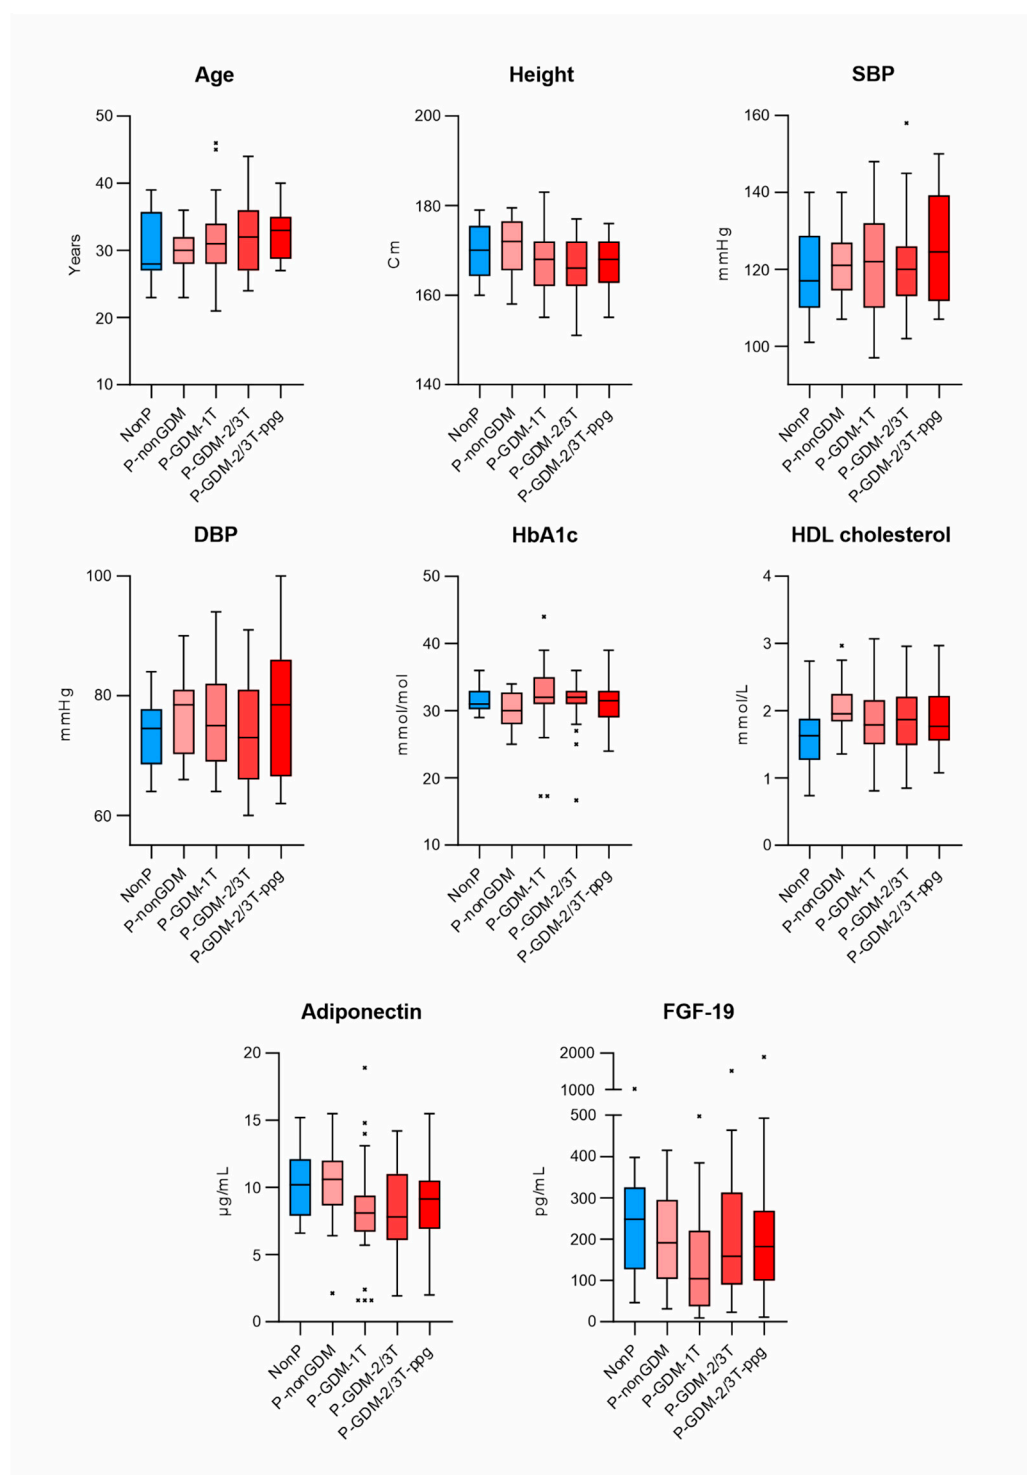

**Figure S5.** Distribution of baseline body composition characteristics and biochemical parameters without statistical significance for all groups of non-pregnant (blue) and pregnant (red) women. Asterisks represent the outliers.

|                     | Age   | Height | Weight | BMI   | Waist | SBP   | DBP   | Heart rate | HbA1c | Cholesterol | Triglycerides | HDL cholesterol | LDL cholesterol | Non-HDL cholesterol | Glucose | C-peptide | CPI   | AFABP | Adiponectin | FGF-19 | AA    | PA    | BA    | VA    | HA    | 3-OH-BA | 2-OH-BA | IBA   | IVA   | 2-MBA | 4-MVA |
|---------------------|-------|--------|--------|-------|-------|-------|-------|------------|-------|-------------|---------------|-----------------|-----------------|---------------------|---------|-----------|-------|-------|-------------|--------|-------|-------|-------|-------|-------|---------|---------|-------|-------|-------|-------|
| Age                 | 1.00  | -0.12  | 0.08   | 0.12  | 0.15  | 0.19  | 0.21  | 0.10       | 0.18  | 0.17        | 0.17          | -0.05           | 0.19            | 0.18                | 0.07    | -0.03     | 0.05  | 0.10  | 0.06        | -0.13  | 0.06  | 0.09  | -0.01 | 0.08  | 0.13  | 0.30    | 0.29    | 0.01  | 0.04  | 0.22  | 0.02  |
| Height              | -0.12 | 1.00   | 0.11   | -0.26 | 0.10  | 0.10  | -0.01 | -0.20      | -0.03 | -0.07       | -0.18         | 0.02            | -0.04           | -0.06               | -0.10   | -0.22     | 0.09  | -0.11 | 0.04        | -0.08  | 0.05  | 0.07  | -0.06 | -0.10 | 0.03  | -0.28   | 0.00    | 0.17  | 0.08  | -0.15 | -0.14 |
| Weight              | 0.08  | 0.11   | 1.00   | 0.93  | 0.63  | 0.30  | 0.35  | 0.35       | 0.14  | 0.16        | 0.39          | -0.24           | 0.15            | 0.25                | 0.03    | 0.40      | -0.42 | 0.32  | -0.33       | -0.11  | -0.15 | -0.07 | -0.09 | 0.03  | -0.04 | 0.18    | 0.02    | -0.05 | -0.05 | 0.08  | 0.19  |
| BMI                 | 0.12  | -0.26  | 0.93   | 1.00  | 0.57  | 0.25  | 0.35  | 0.42       | 0.15  | 0.17        | 0.45          | -0.24           | 0.15            | 0.26                | 0.06    | 0.47      | -0.44 | 0.35  | -0.35       | -0.07  | -0.15 | -0.09 | -0.07 | 0.06  | -0.05 | 0.28    | 0.01    | -0.10 | -0.07 | 0.12  | 0.23  |
| Waist               | 0.15  | 0.10   | 0.63   | 0.57  | 1.00  | 0.22  | 0.20  | 0.32       | 0.11  | 0.21        | 0.42          | -0.19           | 0.21            | 0.29                | 0.19    | 0.31      | -0.35 | 0.20  | -0.26       | -0.01  | -0.1  | -0.04 | -0.02 | -0.10 | -0.08 | 0.12    | 0.01    | 0.03  | -0.25 | -0.07 | 0.26  |
| SBP                 | 0.19  | 0.10   | 0.30   | 0.25  | 0.22  | 1.00  | 0.56  | 0.15       | 0.15  | 0.06        | 0.11          | -0.12           | 0.07            | 0.10                | -0.05   | 0.17      | -0.12 | 0.10  | -0.05       | -0.07  | -0.13 | -0.15 | -0.05 | 0.18  | 0.19  | 0.14    | 0.12    | -0.12 | 0.03  | 0.20  | 0.06  |
| DBP                 | 0.21  | -0.01  | 0.35   | 0.35  | 0.20  | 0.56  | 1.00  | 0.37       | 0.20  | 0.01        | 0.04          | -0.1            | -0.01           | 0.04                | -0.03   | 0.21      | -0.20 | 0.12  | -0.13       | -0.14  | -0.21 | -0.29 | -0.12 | 0.03  | 0.17  | 0.09    | 0.07    | -0.12 | -0.06 | 0.11  | 0.12  |
| Heart rate          | 0.10  | -0.20  | 0.35   | 0.42  | 0.32  | 0.15  | 0.37  | 1.00       | 0.05  | 0.17        | 0.24          | -0.01           | 0.18            | 0.20                | 0.01    | 0.19      | -0.29 | 0.09  | -0.20       | 0.16   | -0.07 | -0.14 | 0.07  | 0.10  | 0.12  | 0.21    | 0.01    | -0.16 | -0.21 | 0.15  | 0.27  |
| HbA1c               | 0.18  | -0.03  | 0.14   | 0.15  | 0.11  | 0.15  | 0.20  | 0.05       | 1.00  | 0.21        | 0.17          | 0.02            | 0.24            | 0.24                | 0.39    | 0.29      | 0.00  | 0.13  | 0.06        | 0.04   | -0.18 | -0.17 | -0.23 | -0.11 | -0.13 | 0.14    | 0.10    | -0.08 | -0.07 | 0.01  | 0.01  |
| Cholesterol         | 0.17  | -0.07  | 0.16   | 0.17  | 0.21  | 0.06  | 0.01  | 0.17       | 0.21  | 1.00        | 0.67          | 0.39            | 0.90            | 0.94                | -0.03   | 0.15      | 0.05  | 0.05  | 0.10        | -0.03  | -0.01 | 0.07  | 0.08  | 0.04  | 0.01  | 0.08    | -0.08   | -0.09 | -0.26 | 0.13  | 0.32  |
| Triglycerides       | 0.17  | -0.18  | 0.39   | 0.45  | 0.42  | 0.11  | 0.04  | 0.24       | 0.17  | 0.67        | 1.00          | -0.04           | 0.56            | 0.74                | 0.02    | 0.38      | -0.18 | 0.07  | -0.24       | 0.03   | -0.08 | 0.01  | -0.01 | 0.12  | -0.01 | 0.23    | 0.01    | -0.10 | -0.13 | 0.10  | 0.30  |
| HDL cholesterol     | -0.05 | 0.02   | -0.24  | -0.24 | -0.19 | -0.12 | -0.10 | -0.01      | 0.02  | 0.39        | -0.04         | 1.00            | 0.13            | 0.09                | -0.15   | -0.12     | 0.28  | -0.18 | 0.43        | -0.09  | 0.10  | 0.13  | 0.14  | -0.01 | 0.04  | -0.08   | -0.07   | 0.10  | -0.15 | -0.02 | 0.17  |
| LDL cholesterol     | 0.19  | -0.04  | 0.15   | 0.15  | 0.21  | 0.07  | -0.01 | 0.18       | 0.24  | 0.90        | 0.56          | 0.13            | 1.00            | 0.94                | 0.01    | 0.12      | 0.04  | 0.12  | 0.04        | 0.01   | -0.04 | 0.03  | 0.04  | 0.02  | -0.01 | 0.06    | -0.09   | -0.15 | -0.23 | 0.12  | 0.22  |
| Non-HDL cholesterol | 0.18  | -0.06  | 0.25   | 0.26  | 0.29  | 0.10  | 0.04  | 0.20       | 0.24  | 0.94        | 0.74          | 0.09            | 0.94            | 1.00                | 0.01    | 0.23      | -0.02 | 0.10  | -0.04       | 0.01   | -0.05 | 0.02  | 0.04  | 0.04  | -0.02 | 0.11    | -0.07   | -0.13 | -0.21 | 0.13  | 0.27  |
| Glucose             | 0.07  | -0.10  | 0.03   | 0.06  | 0.19  | -0.05 | -0.03 | 0.01       | 0.39  | -0.03       | 0.02          | -0.15           | 0.01            | 0.01                | 1.00    | 0.09      | -0.19 | 0.01  | -0.09       | 0.06   | 0.03  | 0.15  | -0.06 | -0.07 | -0.17 | -0.10   | 0.01    | 0.07  | -0.03 | -0.07 | 0.01  |
| C-peptide           | -0.03 | -0.22  | 0.40   | 0.47  | 0.31  | 0.17  | 0.21  | 0.19       | 0.29  | 0.15        | 0.38          | -0.12           | 0.12            | 0.23                | 0.09    | 1.00      | -0.34 | 0.33  | -0.14       | 0.17   | -0.18 | -0.17 | -0.12 | 0.01  | -0.15 | 0.15    | -0.01   | -0.10 | -0.07 | -0.02 | 0.19  |
| CPI                 | 0.05  | 0.09   | -0.42  | -0.44 | -0.35 | -0.12 | -0.20 | -0.29      | 0.00  | 0.05        | -0.18         | 0.28            | 0.04            | -0.02               | -0.19   | -0.34     | 1.00  | -0.10 | 0.37        | 0.01   | 0.12  | 0.08  | 0.09  | -0.07 | 0.02  | -0.08   | -0.05   | 0.04  | 0.09  | -0.19 | -0.21 |
| AFABP               | 0.10  | -0.11  | 0.32   | 0.35  | 0.20  | 0.10  | 0.12  | 0.09       | 0.13  | 0.05        | 0.07          | -0.18           | 0.12            | 0.10                | 0.01    | 0.33      | -0.10 | 1.00  | 0.04        | 0.03   | -0.04 | -0.06 | 0.02  | -0.09 | -0.04 | 0.15    | 0.05    | -0.07 | 0.14  | 0.06  | 0.09  |
| Adiponectin         | 0.06  | 0.04   | -0.33  | -0.35 | -0.26 | -0.05 | -0.13 | -0.20      | 0.06  | 0.10        | -0.24         | 0.43            | 0.04            | -0.04               | -0.09   | -0.14     | 0.37  | 0.04  | 1.00        | 0.05   | 0.01  | 0.05  | 0.06  | -0.11 | 0.00  | -0.03   | 0.00    | -0.02 | -0.02 | -0.09 | -0.13 |
| FGF-19              | -0.13 | -0.08  | -0.11  | -0.07 | -0.01 | -0.07 | -0.14 | 0.16       | 0.04  | -0.03       | 0.03          | -0.09           | 0.01            | 0.01                | 0.06    | 0.17      | 0.01  | 0.03  | 0.05        | 1.00   | 0.04  | 0.03  | 0.13  | -0.12 | -0.01 | -0.1    | -0.14   | -0.01 | 0.01  | -0.14 | -0.08 |
| AA                  | 0.06  | 0.05   | -0.15  | -0.15 | -0.10 | -0.13 | -0.21 | -0.07      | -0.18 | -0.01       | -0.08         | 0.10            | -0.04           | -0.05               | 0.03    | -0.18     | 0.12  | -0.04 | 0.01        | 0.04   | 1.00  | 0.73  | 0.45  | 0.21  | 0.16  | 0.00    | 0.17    | 0.61  | 0.20  | -0.02 | -0.07 |
| PA                  | 0.09  | 0.07   | -0.07  | -0.09 | -0.04 | -0.15 | -0.29 | -0.14      | -0.17 | 0.07        | 0.01          | 0.13            | 0.03            | 0.02                | 0.15    | -0.17     | 0.08  | -0.06 | 0.05        | 0.03   | 0.73  | 1.00  | 0.47  | 0.29  | 0.14  | -0.04   | 0.13    | 0.56  | 0.26  | 0.00  | 0.01  |
| BA                  | -0.01 | -0.06  | -0.09  | -0.07 | -0.02 | -0.05 | -0.12 | 0.07       | -0.23 | 0.08        | -0.01         | 0.14            | 0.04            | 0.04                | -0.06   | -0.12     | 0.09  | 0.02  | 0.06        | 0.13   | 0.45  | 0.47  | 1.00  | 0.42  | 0.16  | 0.03    | -0.11   | 0.05  | 0.10  | 0.19  | 0.20  |
| VA                  | 0.08  | -0.10  | 0.03   | 0.06  | -0.10 | 0.18  | 0.03  | 0.10       | -0.11 | 0.04        | 0.12          | -0.01           | 0.02            | 0.04                | -0.07   | 0.01      | -0.07 | -0.09 | -0.11       | -0.12  | 0.21  | 0.29  | 0.42  | 1.00  | 0.20  | 0.33    | 0.28    | -0.16 | 0.29  | 0.56  | 0.07  |
| HA                  | 0.13  | 0.03   | -0.04  | -0.05 | -0.08 | 0.19  | 0.17  | 0.12       | -0.13 | 0.01        | -0.01         | 0.04            | -0.01           | -0.02               | -0.17   | -0.15     | 0.02  | -0.04 | 0.00        | -0.01  | 0.16  | 0.14  | 0.16  | 0.20  | 1.00  | 0.13    | 0.25    | 0.15  | 0.05  | 0.12  | -0.02 |
| 3-OH-BA             | 0.30  | -0.28  | 0.18   | 0.28  | 0.12  | 0.14  | 0.09  | 0.21       | 0.14  | 0.08        | 0.23          | -0.08           | 0.06            | 0.11                | -0.10   | 0.15      | -0.08 | 0.15  | -0.03       | -0.10  | 0.00  | -0.04 | 0.03  | 0.33  | 0.13  | 1.00    | 0.63    | -0.24 | 0.19  | 0.59  | 0.32  |
| 2-OH-BA             | 0.29  | 0.00   | 0.02   | 0.01  | 0.01  | 0.12  | 0.07  | 0.01       | 0.10  | -0.08       | 0.01          | -0.07           | -0.09           | -0.07               | 0.01    | -0.01     | -0.05 | 0.05  | 0.00        | -0.14  | 0.17  | 0.13  | -0.11 | 0.28  | 0.25  | 0.63    | 1.00    | 0.05  | 0.31  | 0.35  | -0.04 |
| IBA                 | 0.01  | 0.17   | -0.05  | -0.10 | 0.03  | -0.12 | -0.12 | -0.16      | -0.08 | -0.09       | -0.1          | 0.10            | -0.15           | -0.13               | 0.07    | -0.10     | 0.04  | -0.07 | -0.02       | -0.01  | 0.61  | 0.56  | 0.05  | -0.16 | 0.15  | -0.24   | 0.05    | 1.00  | 0.17  | -0.50 | -0.09 |
| IVA                 | 0.04  | 0.08   | -0.05  | -0.07 | -0.25 | 0.03  | -0.06 | -0.21      | -0.07 | -0.26       | -0.13         | -0.15           | -0.23           | -0.21               | -0.03   | -0.07     | 0.09  | 0.14  | -0.02       | 0.01   | 0.20  | 0.26  | 0.10  | 0.29  | 0.05  | 0.19    | 0.31    | 0.17  | 1.00  | 0.13  | -0.17 |
| 2-MBA               | 0.22  | -0.15  | 0.08   | 0.12  | -0.07 | 0.20  | 0.11  | 0.15       | 0.01  | 0.13        | 0.10          | -0.02           | 0.12            | 0.13                | -0.07   | -0.02     | -0.19 | 0.06  | -0.09       | -0.14  | -0.02 | 0.00  | 0.19  | 0.56  | 0.12  | 0.59    | 0.35    | -0.50 | 0.13  | 1.00  | 0.27  |
| 4-MVA               | 0.02  | -0.14  | 0.19   | 0.23  | 0.26  | 0.06  | 0.12  | 0.27       | 0.01  | 0.32        | 0.30          | 0.17            | 0.22            | 0.27                | 0.01    | 0.19      | -0.21 | 0.09  | -0.13       | -0.08  | -0.07 | 0.01  | 0.20  | 0.07  | -0.02 | 0.32    | -0.04   | -0.09 | -0.17 | 0.27  | 1.00  |

**Figure S6.** The values of Pearson’s correlation coefficients between all measurement parameters across all groups. Critical value of significance is  $r > 0.196$ . The color of cells corresponds to the values of Pearson’s correlation coefficients. Red/blue color means positive/negative correlation and color saturation represents the degree of correlation.

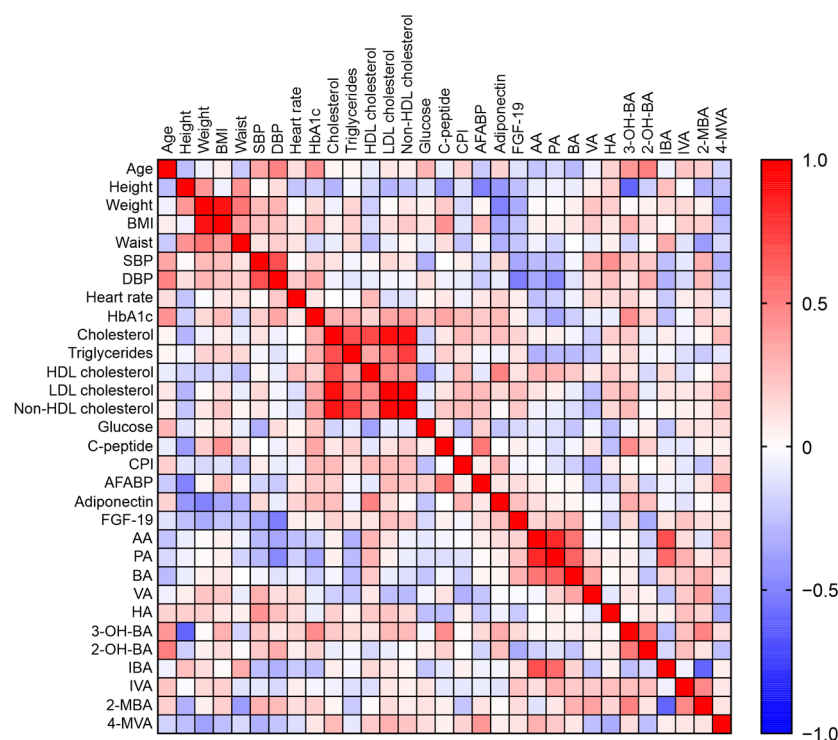

**Figure S7.** Pearson's correlation ( $n = 31$ ) of SCFA and their derivatives with baseline body composition characteristics and biochemical biomarkers for P-GDM-1T group. Critical value of significance is  $r = 0.3494$ . Red/blue color corresponds to positive/negative correlation and color saturation represents the degree of correlation.

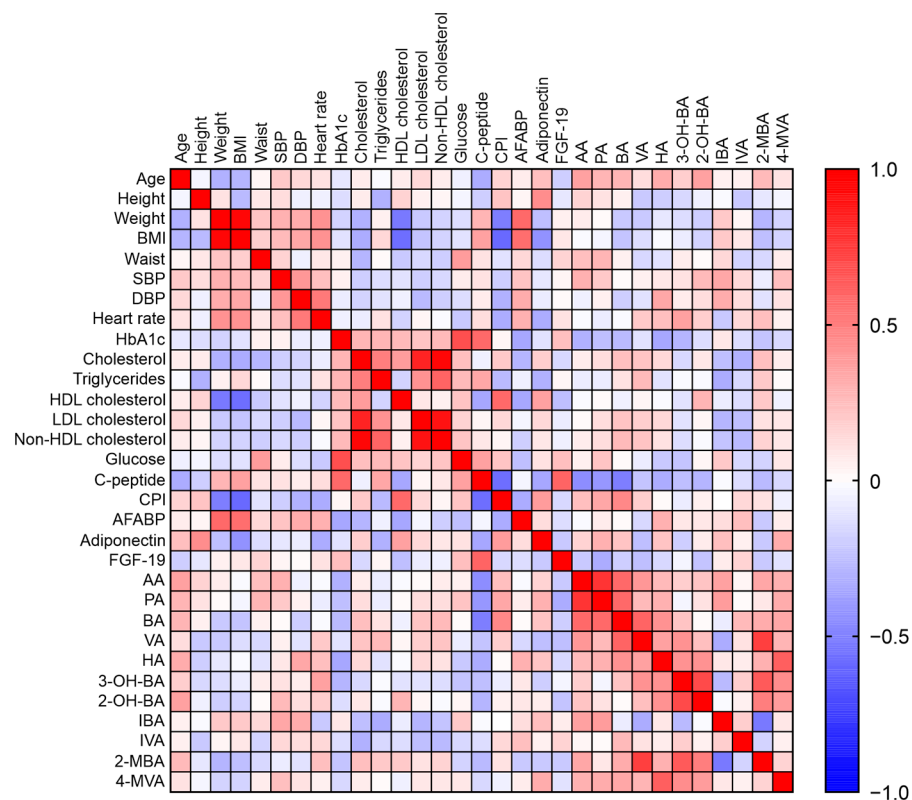

**Figure S8.** Pearson's correlation ( $n = 31$ ) of SCFA and their derivatives with baseline body composition characteristics and biochemical biomarkers for P-GDM-2/3T group. Critical value of significance is  $r = 0.3494$ . Red/blue color corresponds to positive/negative correlation and color saturation represents the degree of correlation.

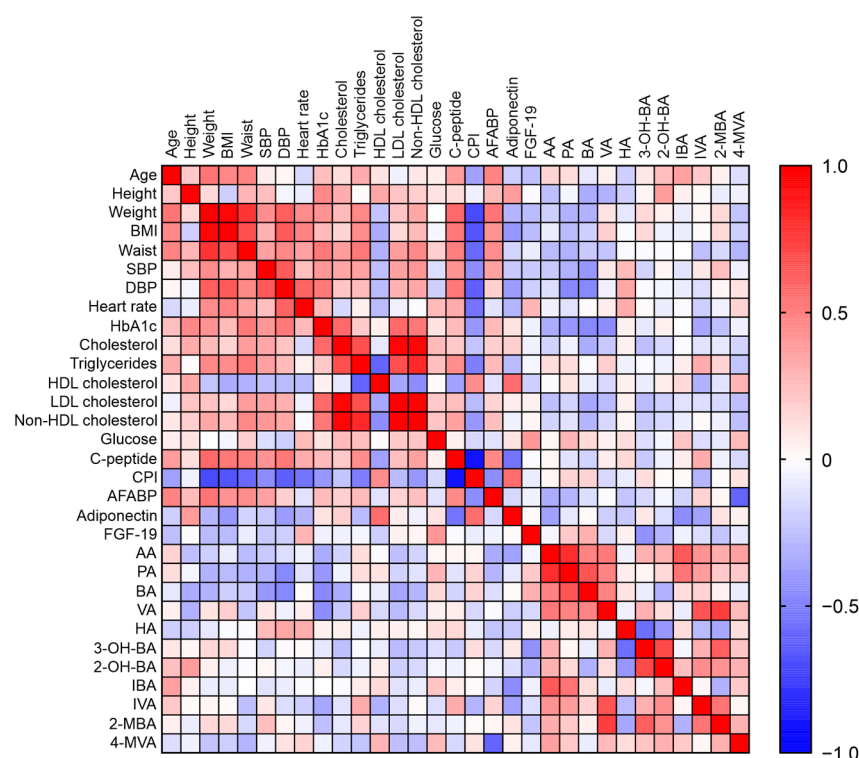

**Figure S9.** Pearson's correlation ( $n = 22$ ) of SCFA and their derivatives with baseline body composition characteristics and biochemical biomarkers for P-GDM-2/3T-ppg group. Critical value of significance is  $r = 0.4044$ . Red/blue color corresponds to positive/negative correlation and color saturation represents the degree of correlation.

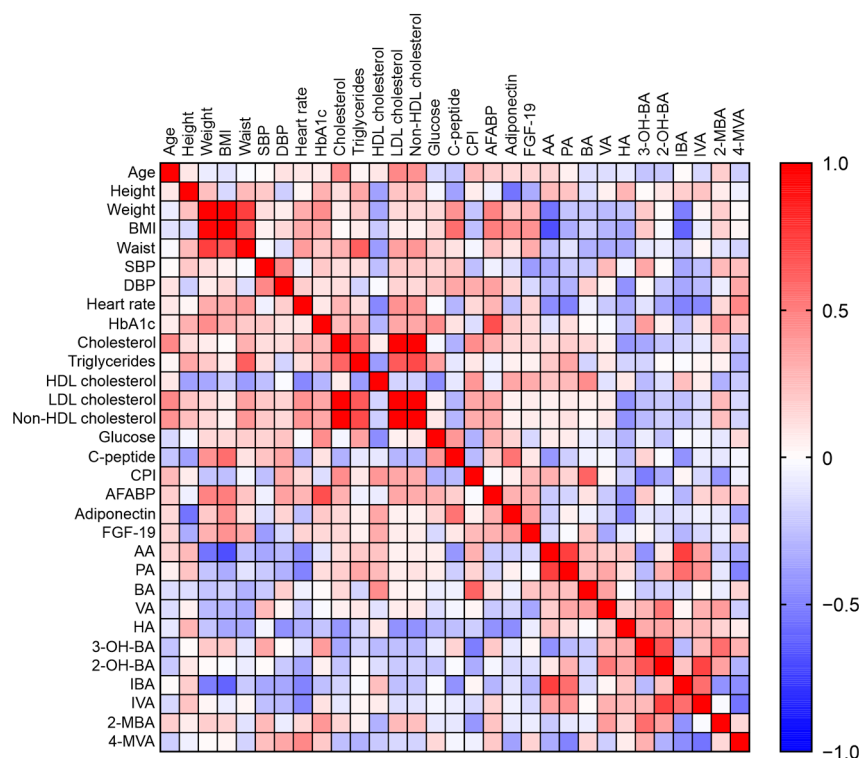

**Figure S10.** Pearson's correlation ( $n = 20$ ) of SCFA and their derivatives with baseline body composition characteristics and biochemical biomarkers for P-nonGDM group. Critical value of significance is  $r = 0.4227$ . Red/blue color corresponds to positive/negative correlation and color saturation represents the degree of correlation.

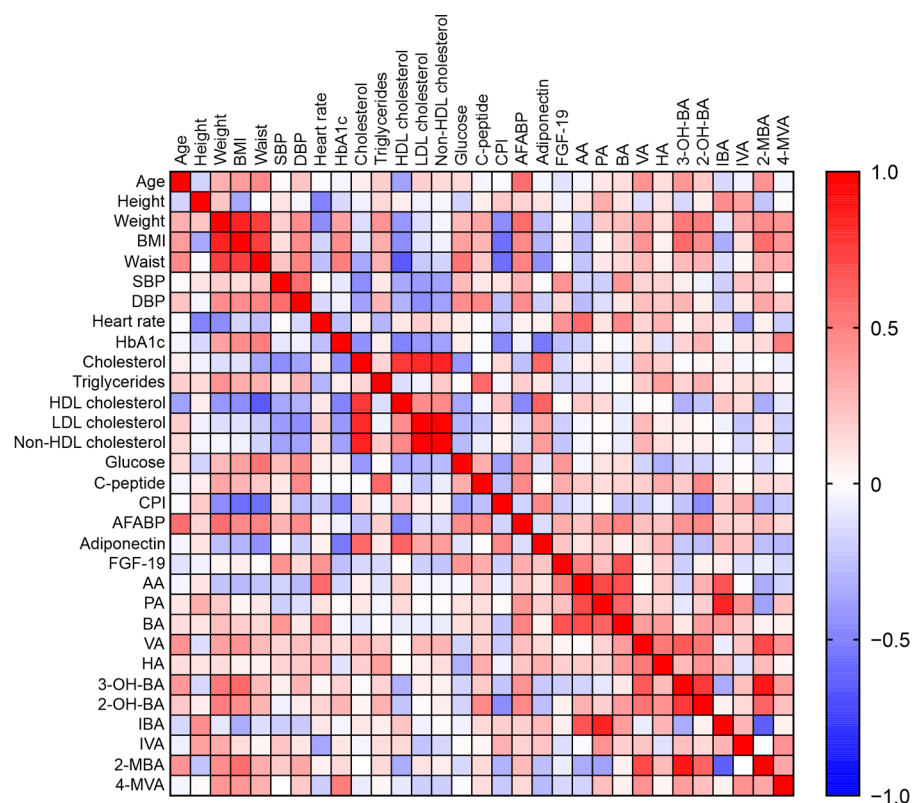

**Figure S11.** Pearson's correlation ( $n = 20$ ) of SCFA and their derivatives with baseline body composition characteristics and biochemical biomarkers for nonP group. Critical value of significance is  $r = 0.4227$ . Red/blue color corresponds to positive/negative correlation and color saturation represents the degree of correlation.

**Table S1.** MS/MS parameters transitions and analytical parameters for SCFA, their derivatives and IS.

| Analyte                            | Q1 Mass (Da) | Q3 Mass (Da) | Dwell time (msec) | DP (V) | EP (V) | CE (V) | CXP (V) |
|------------------------------------|--------------|--------------|-------------------|--------|--------|--------|---------|
| C2 (AA)                            | 166.1        | 91.1         | 100               | 120    | 10     | 20     | 10      |
| C3 (PA)                            | 180.1        | 91.1         | 100               | 60     | 10     | 15     | 10      |
| C4 (BA, IBA)                       | 194.1        | 91.1         | 100               | 60     | 10     | 15     | 10      |
| C4-OH (2-OH-BA, 3-OH-BA, 3-OH-IBA) | 210.1        | 124.1        | 100               | 80     | 10     | 10     | 10      |
| C5 (VA, IVA, 2-MBA)                | 208.1        | 91.1         | 100               | 60     | 10     | 15     | 10      |
| C6 (HA, 3-MVA, 4-MVA)              | 222.1        | 124.1        | 100               | 120    | 10     | 10     | 10      |
| C6-d3 (HA-d3)                      | 225.1        | 124.1        | 100               | 120    | 10     | 15     | 10      |



**Table S2.** Linearity, LOD, LOQ and ULOQ of SCFA and their derivatives.

| Analyte | Coefficient of determination ( $R^2$ ) | LOD ( $\mu\text{mol/L}$ ) | LOQ ( $\mu\text{mol/L}$ ) | ULOQ ( $\mu\text{mol/L}$ ) |
|---------|----------------------------------------|---------------------------|---------------------------|----------------------------|
| AA      | 0.97354                                | $4.27 \times 10^2$        | $1.42 \times 10^1$        | $2.50 \times 10^2$         |
| PA      | 0.99135                                | $4.07 \times 10^3$        | $1.36 \times 10^2$        | $2.50 \times 10^1$         |
| BA      | 0.97892                                | $1.08 \times 10^2$        | $3.58 \times 10^2$        | $2.50 \times 10^1$         |
| VA      | 0.99871                                | $8.23 \times 10^3$        | $2.74 \times 10^2$        | $2.50 \times 10^1$         |
| HA      | 0.99915                                | $3.10 \times 10^2$        | $1.03 \times 10^1$        | $2.50 \times 10^1$         |
| 3-OH-BA | 0.99270                                | $3.04 \times 10^2$        | $1.01 \times 10^1$        | $5.00 \times 10^2$         |
| 2-OH-BA | 0.97617                                | $2.32 \times 10^2$        | $7.72 \times 10^2$        | $1.00 \times 10^2$         |
| IBA     | 0.97530                                | $2.55 \times 10^5$        | $8.51 \times 10^5$        | $1.00 \times 10^1$         |
| IVA     | 0.99128                                | $7.28 \times 10^4$        | $2.43 \times 10^3$        | $1.00 \times 10^1$         |
| 4-MVA   | 0.99943                                | $9.61 \times 10^3$        | $3.20 \times 10^2$        | $1.00 \times 10^1$         |

**Table S3.** The baseline body composition characteristics of each group.

| Header           | NonP<br>(n = 20; 16%,13%) |     |       | P-nonGDM<br>(n = 20; 16%,13%) |     |       | P-GDM-1T<br>(n = 31; 25%) |     |       | P-GDM-2/3T<br>(n = 31; 25%) |     |       | P-GDM-2/3T-ppg<br>(n = 22; 17%,74%) |     |       |
|------------------|---------------------------|-----|-------|-------------------------------|-----|-------|---------------------------|-----|-------|-----------------------------|-----|-------|-------------------------------------|-----|-------|
|                  | 2.5%                      | 50% | 97.5% | 2.5%                          | 50% | 97.5% | 2.5%                      | 50% | 97.5% | 2.5%                        | 50% | 97.5% | 2.5%                                | 50% | 97.5% |
| Parameter        |                           |     |       |                               |     |       |                           |     |       |                             |     |       |                                     |     |       |
| Age (y)          | 24                        | 28  | 39    | 24                            | 30  | 36    | 25                        | 31  | 45    | 24                          | 32  | 43    | 27                                  | 33  | 39    |
| Height (cm)      | 160                       | 170 | 179   | 159                           | 172 | 179   | 156                       | 168 | 179   | 153                         | 166 | 176   | 158                                 | 168 | 175   |
| Weight (kg)      | 53                        | 63  | 81    | 56                            | 68  | 99    | 54                        | 78  | 115   | 61                          | 82  | 118   | 55                                  | 80  | 108   |
| BMI (kg/m2)      | 19                        | 22  | 28    | 20                            | 23  | 34    | 20                        | 27  | 38    | 23                          | 29  | 44    | 19                                  | 29  | 40    |
| Waist (cm)       | 66                        | 76  | 90    | 68                            | 83  | 102   | 67                        | 93  | 120   | 55                          | 98  | 116   | 51                                  | 96  | 123   |
| SBP (mmHg)       | 103                       | 117 | 138   | 107                           | 121 | 137   | 98                        | 122 | 146   | 105                         | 120 | 148   | 107                                 | 125 | 145   |
| DBP (mmHg)       | 65                        | 75  | 83    | 67                            | 79  | 89    | 64                        | 75  | 93    | 63                          | 73  | 90    | 62                                  | 79  | 99    |
| Heart rate (BPM) | 59                        | 76  | 95    | 66                            | 83  | 95    | 68                        | 85  | 111   | 66                          | 89  | 106   | 63                                  | 88  | 110   |

**Table S4.** The biochemical parameters of each group.

| Header                       | NonP<br>(n = 20; 16,13%) |       |        | P-nonGDM<br>(n = 20; 16,13%) |        |         | P-GDM-1T<br>(n = 31; 25%) |        |         | P-GDM-2/3T<br>(n = 31; 25%) |        |         | P-GDM-2/3T-ppg<br>(n = 22; 17,74%) |        |         |
|------------------------------|--------------------------|-------|--------|------------------------------|--------|---------|---------------------------|--------|---------|-----------------------------|--------|---------|------------------------------------|--------|---------|
| Parameter                    | 2.5%                     | 50%   | 97.5%  | 2.5%                         | 50%    | 97.5%   | 2.5%                      | 50%    | 97.5%   | 2.5%                        | 50%    | 97.5%   | 2.5%                               | 50%    | 97.5%   |
| HbA1c (mmol/mol)             | 29                       | 31    | 36     | 26                           | 30     | 34      | 17                        | 32     | 40      | 23                          | 32     | 36      | 25                                 | 32     | 38      |
| Cholesterol (mmol/L)         | 3.27                     | 4.18  | 5.81   | 4.18                         | 5.06   | 8.47    | 2.85                      | 5.30   | 7.35    | 4.22                        | 6.22   | 8.75    | 4.51                               | 6.03   | 8.38    |
| Triglycerides (mmol/L)       | 0.55                     | 0.8   | 1.55   | 0.89                         | 1.20   | 2.00    | 0.46                      | 1.54   | 2.52    | 0.77                        | 2.29   | 3.52    | 0.77                               | 2.41   | 3.75    |
| HDL cholesterol (mmol/L)     | 0.92                     | 1.63  | 2.55   | 1.43                         | 1.96   | 2.87    | 0.81                      | 1.79   | 3.06    | 1.17                        | 1.87   | 2.62    | 1.25                               | 1.77   | 2.77    |
| LDL cholesterol (mmol/L)     | 1.07                     | 2.15  | 2.95   | 1.73                         | 2.35   | 5.71    | 1.09                      | 2.79   | 4.04    | 1.37                        | 3.29   | 5.63    | 1.80                               | 3.07   | 4.74    |
| Non-HDL cholesterol (mmol/L) | 1.49                     | 2.55  | 3.65   | 2.30                         | 2.90   | 6.57    | 1.33                      | 3.50   | 5.20    | 2.27                        | 4.20   | 6.85    | 2.41                               | 4.05   | 6.45    |
| Glucose (mmol/L)             | 4.24                     | 4.7   | 5.21   | 3.80                         | 4.25   | 4.96    | 4.28                      | 5.10   | 5.85    | 2.73                        | 4.70   | 5.35    | 4.05                               | 4.35   | 4.95    |
| C-peptide (pmol/L)           | 208.67                   | 437   | 646.73 | 224.67                       | 649.50 | 1219.25 | 152.00                    | 553.00 | 1493.75 | 278.67                      | 680.00 | 1516.50 | 366.15                             | 635.00 | 1525.98 |
| CPI (ng/mg)                  | 4.15                     | 8.47  | 13.01  | 2.30                         | 6.30   | 13.62   | 1.42                      | 4.50   | 13.90   | 1.47                        | 5.93   | 11.32   | 2.84                               | 7.08   | 12.59   |
| AFABP (ng/mL)                | 13.37                    | 20.3  | 34.97  | 3.96                         | 19.80  | 31.56   | 3.27                      | 20.40  | 55.35   | 4.49                        | 18.20  | 39.93   | 8.25                               | 21.25  | 52.13   |
| Adiponectin (µg/mL)          | 6.65                     | 10.2  | 14.82  | 4.16                         | 0.60   | 14.84   | 1.60                      | 8.10   | 15.83   | 2.66                        | 7.80   | 13.68   | 2.53                               | 9.15   | 15.03   |
| FGF-19 (pg/mL)               | 49.17                    | 248.3 | 726.12 | 38.45                        | 190.95 | 404.16  | 9.53                      | 104.60 | 413.00  | 31.90                       | 158.60 | 725.23  | 14.56                              | 182.45 | 1158.72 |

Abbreviations: SBP, systolic blood pressure; DBP, diastolic blood pressure; HbA1c, glycated hemoglobin; CPI, C-peptide index; AFABP, adipocyte fatty acid-binding protein; FGF-19, fibroblast growth factor 19.

**Table S5.** The concentrations of SCFA and their derivatives of each group.

| Header           | NonP<br>(n = 20; 16,13%) |       |        | P-nonGDM<br>(n = 20; 16,13%) |       |       | P-GDM-1T<br>(n = 31; 25%) |       |        | P-GDM-2/3T<br>(n = 31; 25%) |       |        | P-GDM-2/3T-ppg<br>(n = 22; 17,74%) |       |        |
|------------------|--------------------------|-------|--------|------------------------------|-------|-------|---------------------------|-------|--------|-----------------------------|-------|--------|------------------------------------|-------|--------|
|                  | 2.5%                     | 50%   | 97.5%  | 2.5%                         | 50%   | 97.5% | 2.5%                      | 50%   | 97.5%  | 2.5%                        | 50%   | 97.5%  | 2.5%                               | 50%   | 97.5%  |
| Analyte          |                          |       |        |                              |       |       |                           |       |        |                             |       |        |                                    |       |        |
| AA (μmol/L)      | 2.48                     | 10.99 | 46.42  | 1.24                         | 9.42  | 22.18 | 2.21                      | 10.04 | 27.61  | 2.11                        | 9.49  | 29.86  | 2.68                               | 8.99  | 26.27  |
| PA (μmol/L)      | 0.19                     | 0.61  | 1.61   | 0.07                         | 0.78  | 1.59  | 0.24                      | 0.77  | 1.78   | 0.11                        | 0.78  | 2.10   | 0.06                               | 0.74  | 1.36   |
| BA (μmol/L)      | 0.11                     | 0.25  | 0.60   | 0.16                         | 0.35  | 1.22  | 0.14                      | 0.32  | 0.89   | 0.12                        | 0.29  | 0.84   | 0.12                               | 0.32  | 0.59   |
| VA (μmol/L)      | 0.03                     | 0.05  | 0.13   | 0.01                         | 0.06  | 0.10  | 0.02                      | 0.05  | 0.12   | 0.02                        | 0.05  | 0.15   | 0.03                               | 0.05  | 0.22   |
| HA (μmol/L)      | 0.07                     | 0.19  | 0.41   | 0.05                         | 0.18  | 0.35  | 0.09                      | 0.17  | 0.41   | 0.06                        | 0.19  | 0.43   | 0.10                               | 0.20  | 0.36   |
| 3-OH-BA (μmol/L) | 12.02                    | 29.67 | 186.65 | 16.84                        | 31.84 | 52.97 | 14.08                     | 45.21 | 193.40 | 15.15                       | 46.43 | 141.44 | 28.47                              | 91.19 | 277.88 |
| 2-OH-BA (μmol/L) | 12.72                    | 31.09 | 81.81  | 8.23                         | 22.58 | 34.63 | 12.31                     | 23.21 | 56.55  | 10.97                       | 24.62 | 43.15  | 15.77                              | 26.12 | 59.77  |
| IBA (μmol/L)     | 0.25                     | 0.74  | 1.67   | 0.16                         | 0.64  | 2.10  | 0.19                      | 0.73  | 1.46   | 0.26                        | 0.69  | 1.79   | 0.21                               | 0.56  | 1.25   |
| IVA (μmol/L)     | 0.28                     | 0.49  | 1.10   | 0.24                         | 0.37  | 0.70  | 0.26                      | 0.38  | 0.68   | 0.15                        | 0.33  | 0.55   | 0.23                               | 0.35  | 1.50   |
| 2-MBA (μmol/L)   | 0.15                     | 0.42  | 12.32  | 0.13                         | 1.98  | 5.23  | 0.17                      | 1.02  | 10.85  | 0.15                        | 0.62  | 10.23  | 0.29                               | 1.23  | 34.27  |
| 4-MVA (μmol/L)   | 0.01                     | 0.06  | 0.16   | 0.07                         | 0.21  | 0.38  | 0.09                      | 0.21  | 0.53   | 0.12                        | 0.20  | 0.40   | 0.16                               | 0.26  | 0.43   |

**Table S6.** ANOVA test comparing mean values of SCFA and their derivatives. P-value <0.05 is statistically significant (bold).

| Analyte | P-nonGDM<br>vs.<br>nonP | P-GDM-1T<br>vs.<br>nonP | P-GDM-2/3T<br>vs.<br>nonP | P-GDM-2/3T-<br>ppg<br>vs.<br>nonP | P-GDM-1T<br>vs.<br>nonP | P-GDM-2/3T<br>vs.<br>P-nonGDM | P-GDM-2/3T-ppg<br>vs.<br>P-nonGDM | P-GDM-1T<br>vs.<br>P-GDM-2/3T | P-GDM-1T<br>vs.<br>P-GDM-2/3T-<br>ppg | P-GDM-2/3T<br>vs.<br>P-GDM-2/3T-<br>ppg |
|---------|-------------------------|-------------------------|---------------------------|-----------------------------------|-------------------------|-------------------------------|-----------------------------------|-------------------------------|---------------------------------------|-----------------------------------------|
| AA      | 0.6677                  | 0.8387                  | 0.8753                    | 0.8387                            | 0.9937                  | 0.9855                        | 0.9952                            | 0.9952                        | 0.9952                                | 0.9952                                  |
| PA      | 0.9757                  | 0.9891                  | 0.9925                    | 0.9863                            | 0.9172                  | 0.9542                        | 0.9925                            | 0.9925                        | 0.9542                                | 0.9656                                  |
| BA      | 0.1464                  | 0.6527                  | 0.7840                    | 0.7840                            | 0.7840                  | 0.7840                        | 0.7840                            | 0.9904                        | 0.9904                                | 0.9904                                  |
| VA      | 0.9999                  | 0.9999                  | 0.9999                    | 0.9552                            | 0.9999                  | 0.9999                        | 0.9267                            | 0.9999                        | 0.9267                                | 0.9329                                  |
| HA      | 0.8627                  | 0.9260                  | 0.9656                    | 0.9822                            | 0.9822                  | 0.9801                        | 0.9398                            | 0.9822                        | 0.9656                                | 0.9801                                  |
| 3-OH-BA | 0.6535                  | 0.5049                  | 0.5049                    | <b>0.0025</b>                     | 0.1484                  | 0.1255                        | <b>0.0001</b>                     | 0.8712                        | <b>0.0402</b>                         | 0.0536                                  |
| 2-OH-BA | 0.1246                  | 0.7232                  | 0.5399                    | 0.9862                            | 0.5399                  | 0.7232                        | 0.1136                            | 0.8368                        | 0.7232                                | 0.5369                                  |
| IBA     | 0.9895                  | 0.9957                  | 0.9957                    | 0.8109                            | 0.9957                  | 0.9957                        | 0.9799                            | 0.9957                        | 0.8508                                | 0.8429                                  |
| IVA     | <b>0.0386</b>           | 0.0514                  | <b>0.0005</b>             | 0.2068                            | 0.8803                  | 0.7924                        | 0.8035                            | 0.4416                        | 0.8803                                | 0.3000                                  |
| 2-MBA   | 0.5284                  | 0.3778                  | 0.8775                    | 0.3324                            | 0.9829                  | 0.8775                        | 0.9829                            | 0.8775                        | 0.9829                                | 0.8209                                  |
| 4-MVA   | <b>&lt;0.0001</b>       | <b>&lt;0.0001</b>       | <b>&lt;0.0001</b>         | <b>&lt;0.0001</b>                 | 0.9855                  | 0.9855                        | 0.3055                            | 0.9998                        | 0.3247                                | 0.3247                                  |

**Table S7.** ANOVA test comparing mean values of baseline body composition characteristics and biochemical parameters. P-value <0.05 is statistically significant (bold).

| Parameter           | P-nonGDM vs. nonP | P-GDM-1T vs. nonP | P-GDM-2/3T vs. nonP | P-GDM-2/3T-PPG vs. nonP | P-GDM-1T vs. nonP | P-GDM-2/3T vs. P-nonGDM | P-GDM-2/3T-PPG vs. P-nonGDM | P-GDM-1T vs. P-GDM-2/3T | P-GDM-1T vs. P-GDM-2/3T-PPG | P-GDM-2/3T vs. P-GDM-2/3T-PPG |
|---------------------|-------------------|-------------------|---------------------|-------------------------|-------------------|-------------------------|-----------------------------|-------------------------|-----------------------------|-------------------------------|
| Age                 | 0.9556            | 0.9364            | 0.8278              | 0.8266                  | 0.8278            | 0.6671                  | 0.6671                      | 0.9556                  | 0.9556                      | 0.9556                        |
| Height              | 0.9267            | 0.7768            | 0.5913              | 0.8049                  | 0.3487            | 0.1874                  | 0.4512                      | 0.9690                  | 0.9690                      | 0.9690                        |
| Weight              | 0.5792            | <b>0.0048</b>     | <b>0.0003</b>       | <b>0.0025</b>           | 0.1807            | <b>0.0340</b>           | 0.0997                      | 0.7627                  | 0.8391                      | 0.8391                        |
| BMI                 | 0.6995            | <b>0.0011</b>     | <b>&lt;0.0001</b>   | <b>0.0006</b>           | <b>0.0291</b>     | <b>0.0016</b>           | <b>0.0141</b>               | 0.6995                  | 0.8214                      | 0.8214                        |
| Waist               | 0.2516            | <b>0.0005</b>     | <b>&lt;0.0001</b>   | <b>0.0003</b>           | 0.1639            | 0.0548                  | 0.0830                      | 0.8923                  | 0.8923                      | 0.9844                        |
| SBP                 | 0.9669            | 0.9611            | 0.9669              | 0.6835                  | 0.9977            | 0.9977                  | 0.9495                      | 0.9977                  | 0.9495                      | 0.9479                        |
| DBP                 | 0.8390            | 0.9133            | 0.9491              | 0.7819                  | 0.9491            | 0.8556                  | 0.9491                      | 0.9491                  | 0.9491                      | 0.8390                        |
| Heart rate          | 0.3194            | <b>0.0042</b>     | <b>0.0018</b>       | <b>0.0042</b>           | 0.4886            | 0.4268                  | 0.4458                      | 0.9843                  | 0.9843                      | 0.9910                        |
| HbA1c               | 0.6095            | 0.9885            | 0.9480              | 0.9480                  | 0.4749            | 0.8926                  | 0.9430                      | 0.9480                  | 0.9480                      | 0.9885                        |
| Cholesterol         | <b>0.0319</b>     | <b>0.0100</b>     | <b>&lt;0.0001</b>   | <b>&lt;0.0001</b>       | 0.8742            | <b>0.0331</b>           | 0.1160                      | <b>0.0297</b>           | 0.1160                      | 0.8742                        |
| Triglycerides       | 0.2444            | <b>0.0074</b>     | <b>&lt;0.0001</b>   | <b>&lt;0.0001</b>       | 0.3569            | <b>&lt;0.0001</b>       | <b>&lt;0.0001</b>           | <b>&lt;0.0001</b>       | <b>&lt;0.0001</b>           | 0.9803                        |
| HDL cholesterol     | 0.0541            | 0.5702            | 0.4890              | 0.4857                  | 0.5702            | 0.6271                  | 0.7407                      | 0.9577                  | 0.9577                      | 0.9577                        |
| LDL cholesterol     | 0.3719            | 0.2164            | <b>0.0005</b>       | <b>0.0150</b>           | 0.8523            | 0.1474                  | 0.4709                      | 0.1351                  | 0.4709                      | 0.6956                        |
| Non-HDL cholesterol | 0.1610            | 0.0570            | <b>&lt;0.0001</b>   | <b>0.0001</b>           | 0.8503            | <b>0.0119</b>           | 0.0570                      | <b>0.0169</b>           | 0.0748                      | 0.8503                        |
| Glucose             | <b>0.0179</b>     | <b>0.0086</b>     | 0.6694              | 0.0895                  | <b>&lt;0.0001</b> | <b>0.0246</b>           | 0.6694                      | <b>0.0003</b>           | <b>&lt;0.0001</b>           | 0.1201                        |
| C-peptide           | 0.2746            | 0.4571            | <b>0.0216</b>       | <b>0.0305</b>           | 0.8664            | 0.8664                  | 0.8664                      | 0.4569                  | 0.4569                      | 0.9323                        |
| CPI                 | 0.0862            | <b>&lt;0.0001</b> | <b>0.0077</b>       | 0.3487                  | 0.3387            | 0.6470                  | 0.6470                      | 0.4301                  | <b>0.0430</b>               | 0.3952                        |
| AFABP               | 0.9270            | 0.9607            | 0.9270              | <b>&lt;0.0001</b>       | 0.9270            | 0.9607                  | <b>0.0011</b>               | 0.9270                  | <b>&lt;0.0001</b>           | <b>0.0002</b>                 |
| Adiponectin         | 0.9785            | 0.2878            | 0.3224              | 0.6259                  | 0.2448            | 0.2878                  | 0.6113                      | 0.9785                  | 0.9395                      | 0.9437                        |
| FGF-19              | 0.9559            | 0.5108            | 0.9559              | 0.9826                  | 0.9559            | 0.9559                  | 0.9559                      | 0.7886                  | 0.4886                      | 0.9559                        |

**Table S8.** Fold-change values between the groups of women with GDM and controls.

| Parameter           | P-GDM-1T    | P-GDM-2/3T  | P-GDM-2/3T-ppg | P-GDM-1T        | P-GDM-2/3T      | P-GDM-2/3T-ppg  |
|---------------------|-------------|-------------|----------------|-----------------|-----------------|-----------------|
|                     | vs.<br>nonP | vs.<br>nonP | vs.<br>nonP    | vs.<br>P-nonGDM | vs.<br>P-nonGDM | vs.<br>P-nonGDM |
| Age                 | 1.11        | 1.14        | 1.18           | 1.03            | 1.07            | 1.10            |
| Height              | 0.99        | 0.98        | 0.99           | 0.98            | 0.97            | 0.98            |
| Weight              | 1.25        | 1.30        | 1.28           | 1.16            | 1.21            | 1.19            |
| BMI                 | 1.23        | 1.29        | 1.30           | 1.17            | 1.22            | 1.24            |
| Waist               | 1.23        | 1.30        | 1.27           | 1.12            | 1.18            | 1.16            |
| SBP                 | 1.04        | 1.03        | 1.06           | 1.01            | 0.99            | 1.03            |
| DBP                 | 1.01        | 0.98        | 1.05           | 0.96            | 0.93            | 1.00            |
| Heart rate          | 1.13        | 1.18        | 1.16           | 1.02            | 1.07            | 1.05            |
| HbA1c               | 1.03        | 1.03        | 1.02           | 1.07            | 1.07            | 1.05            |
| Cholesterol         | 1.27        | 1.49        | 1.44           | 1.05            | 1.23            | 1.19            |
| Triglycerides       | 1.94        | 2.88        | 3.03           | 1.29            | 1.92            | 2.01            |
| HDL cholesterol     | 1.10        | 1.15        | 1.09           | 0.92            | 0.96            | 0.91            |
| LDL cholesterol     | 1.30        | 1.53        | 1.43           | 1.19            | 1.40            | 1.31            |
| Non-HDL cholesterol | 1.37        | 1.65        | 1.59           | 1.21            | 1.45            | 1.40            |
| Glucose             | 1.09        | 1.00        | 0.93           | 1.20            | 1.11            | 1.02            |
| C-peptide           | 1.27        | 1.56        | 1.45           | 0.85            | 1.05            | 0.98            |
| CPI                 | 0.53        | 0.70        | 0.84           | 0.71            | 0.94            | 1.12            |
| AFABP               | 1.00        | 0.90        | 1.05           | 1.03            | 0.92            | 1.07            |
| Adiponectin         | 0.79        | 0.76        | 0.90           | 0.76            | 0.74            | 0.86            |
| FGF-19              | 0.42        | 0.64        | 0.73           | 0.55            | 0.83            | 0.96            |
| AA                  | 0.91        | 0.86        | 0.82           | 1.07            | 1.01            | 0.95            |
| PA                  | 1.27        | 1.29        | 1.21           | 0.99            | 1.01            | 0.95            |
| BA                  | 1.28        | 1.16        | 1.28           | 0.91            | 0.83            | 0.91            |
| VA                  | 1.00        | 1.00        | 1.00           | 0.83            | 0.83            | 0.83            |
| HA                  | 0.89        | 1.00        | 1.05           | 0.94            | 1.06            | 1.11            |
| 3-OH-BA             | 1.52        | 1.57        | 3.07           | 1.42            | 1.46            | 2.86            |
| 2-OH-BA             | 0.75        | 0.79        | 0.84           | 1.03            | 1.09            | 1.16            |
| IBA                 | 0.99        | 0.94        | 0.76           | 1.14            | 1.08            | 0.87            |
| IVA                 | 0.78        | 0.68        | 0.71           | 1.03            | 0.89            | 0.93            |
| 2-MBA               | 2.46        | 1.49        | 2.96           | 0.52            | 0.31            | 0.62            |
| 4-MVA               | 3.50        | 3.33        | 4.33           | 1.00            | 0.95            | 1.24            |
